# Supplementary material for: Asymmetric Rh–O–Co bridge sites enable superior bifunctional catalysis for hydrazine-assisted hydrogen production
Source: Royal Society of Chemistry journal article supplement (doi:10.1039/d4sc07442d), 2024-12-16
Supplement: d4sc07442d1.pdf [file d4sc07442d1.pdf]

## Supporting Information

### **Asymmetric Rh-O-Co bridge sites enable superior bifunctional catalysis for hydrazine-assisted hydrogen production**

Jinrui Hu,<sup>#a</sup> Xuan Wang,<sup>#a</sup> Yi Zhou,<sup>a</sup> Meihan Liu,<sup>a</sup> Caikang Wang,<sup>a</sup> Meng Li,<sup>a</sup> Heng Liu,<sup>b</sup> Hao Li,<sup>b</sup> Yawen Tang,<sup>\*a</sup> Gengtao Fu<sup>\*a</sup>

<sup>a</sup> Jiangsu Key Laboratory of New Power Batteries, Jiangsu Collaborative Innovation Center of Biomedical Functional Materials, School of Chemistry and Materials Science, Nanjing Normal University, Nanjing 210023, China

E-mail: tangyawen@njnu.edu.cn (Y. Tang); gengtaofu@njnu.edu.cn (G. Fu)

<sup>b</sup> Advanced Institute for Materials Research (WPI-AIMR), Tohoku University, Sendai 980-8577, Japan

<sup>#</sup> These authors contributed equally to this work.

## Experimental

### *Reagents and chemicals*

Cobalt(II) nitrate hexahydrate ( $\text{Co}(\text{NO}_3)_2 \cdot 6\text{H}_2\text{O}$ ), arginine ( $\text{C}_6\text{H}_{14}\text{N}_4\text{O}_2$ ), hydrazine monohydrate ( $\text{N}_2\text{H}_4 \cdot \text{H}_2\text{O}$ ) and ethylene glycol (EG) were purchased from Aladdin Chemistry Co., Ltd (Shanghai China). The 20% Pt/C was purchased from Johnson Matthey Corporation. Rhodium(III) Chloride Hydrate ( $\text{RhCl}_3 \cdot n\text{H}_2\text{O}$ ) was purchased from D&B Biological Science and Technology Co., Ltd (Shanghai China). Ethanol ( $\text{C}_2\text{H}_5\text{OH}$ ) was purchased from Sinopharm Chemical Reagent Co., Ltd (Shanghai, China). All the reagents were of analytical reagent grade and used without further purification.

### *Synthesis of $\text{Co}_3\text{O}_4$ BNSs*

Typically, 300 mg of arginine and 291 mg of  $\text{Co}(\text{NO}_3)_2$  were dissolved in 28 mL of deionized (DI) water and 7 mL of ethanol by sonication and stirred for 1 h. Then, the prepared solution was transferred into a 50 mL Teflon-lined stainless-steel autoclave, which was maintained at 160 °C for 5 h before cooling down to room temperature. The solution was centrifuged and washed three times with a mixed solution of ethanol and DI, and freeze-dried to obtain the  $\text{Co}_3\text{O}_4$  BNSs.

### *Synthesis of Rh- $\text{Co}_3\text{O}_4$ BNSs*

For the synthesis of Rh- $\text{Co}_3\text{O}_4$  BNSs (Rh<sub>15.1 wt%</sub>- $\text{Co}_3\text{O}_4$  BNSs), 50 mg of  $\text{Co}_3\text{O}_4$  BNSs was dissolved in 50 mL of EG and ultrasound for 10 min. Then 1.2 mL of  $\text{RhCl}_3 \cdot n\text{H}_2\text{O}$  aqueous solution (20 mg mL<sup>-1</sup>) was dropwise added to the above mixture under strong stirring. After stirring for 2 h, the obtained mixture was heated to 160 °C and refluxed for 3 h. The Rh- $\text{Co}_3\text{O}_4$  BNSs was obtained by washing three times and drying again. While keeping other experimental conditions and the mass of the  $\text{Co}_3\text{O}_4$  BNSs precursor unchanged, the  $\text{RhCl}_3 \cdot n\text{H}_2\text{O}$  solution changed to 0.6 mL and 1.8 mL respectively, for obtaining the Rh<sub>7.9 wt%</sub>- $\text{Co}_3\text{O}_4$  BNSs and Rh<sub>31.7 wt%</sub>- $\text{Co}_3\text{O}_4$  BNSs.

### *Physicochemical characterization*

The crystal phase of catalysts was investigated by X-ray powder diffraction (XRD) on a D/max-rC X-ray diffractometer (Cu K $\alpha$  radiation,  $\lambda = 1.5406 \text{ \AA}$ ). Scanning electron microscopy (SEM) and transmission electron microscopy (TEM) images were obtained using a JEOL JSM7500F and a HITACHI 7800 (with an accelerating voltage of 80 kV), respectively. High-resolution transmission

electron microscopy (HRTEM), high-angle annular dark-field scanning transmission electron microscopy (HAADF-STEM), and energy-dispersive X-ray spectroscopy (EDX) were acquired on a JEOL JEM-2100F with accelerating voltages of 200 kV. Ultraviolet and visible spectroscopy (UV-vis) spectra were measured using a UV-670 spectrophotometer produced by MAPYDA. X-ray photoelectron spectroscopy (XPS) data were obtained on Thermo VG Scientific ESCALAB 250 spectrometer with an Al K $\alpha$  light source. The synchrotron-based X-ray absorption spectroscopy (XAS) was measured at the beamline 1W1B station of Beijing Synchrotron Radiation Facility (BSRF). The XAS spectra were analysed using the ATHENA software package, with a Fourier transform in the  $k$ -range of 3 to 10 and a window function of Hanning. The wavelet transform was performed using  $k$ -space with a  $k$ -weight of 2. Electron paramagnetic resonance (EPR) data were obtained on Bruker A300-10 at 77 K. In situ Raman spectra were recorded on a Raman spectrometer (Lab RAM HR800) at the radiation wavelength of 532 nm.

### ***Electrochemical Measurements***

All electrochemical tests were conducted at room temperature (25°C) using a CHI 760E electrochemical analyzer in a three-electrode configuration. A glassy carbon electrode (GCE,  $d = 3$  mm) coated with catalyst ink was used as the working electrode, a saturated calomel electrode (SCE) served as the reference electrode, and a graphite rod was employed as the counter electrode. To fabricate the working electrode, 4 mg of catalyst and 1 mg of Vulcan XC-72 carbon were dispersed in a mixture of 0.5 mL ethanol and 0.5 mL water. The resulting dispersion was homogenized by sonication to form a uniform ink. Subsequently, 5  $\mu$ L of the catalyst ink was applied to the surface of the GCE in two sequential additions, each followed by drying. Finally, 3  $\mu$ L of 20% Nafion solution was added, and the electrode was dried to complete the fabrication of the working electrode. All electrode potentials measured using a SCE as the reference electrode were converted to reversible hydrogen electrodes (RHE) according to the following equation:  $E_{(\text{RHE})} = E_{(\text{SCE})} + 0.059 \text{ pH} + 0.242$ . The Tafel slope was calculated according to the Tafel equation as follows:  $\eta = b \log(j/j_0)$ , where  $\eta$  denotes the overpotential,  $b$  denotes the Tafel slope,  $j$  denotes the current density, and  $j_0$  denotes the exchange current density.

Hydrogen evolution reaction (HER) was conducted in a N<sub>2</sub>-saturated 0.5 M H<sub>2</sub>SO<sub>4</sub> solution. Linear sweep voltammetry (LSV) curves were performed at a sweep rate 5 mV s<sup>-1</sup>, with all data corrected for  $iR$  losses. The overpotential ( $\eta$ ) was calculated with following equation:  $\eta = E_{\text{RHE}} - 0 \text{ V}$ .

Electrochemical impedance spectroscopy (EIS) plots were conducted at the potential of  $10 \text{ mA cm}^{-2}$  ( $E_{10}$ ) over a scanning frequency range from 100 kHz to 0.01 Hz. The electrochemical double-layer capacitance ( $C_{dl}$ ) was obtained by a series of CV tests (scan rate 20 to 100  $\text{mV s}^{-1}$ ) in the potential range of -0.02 to 0.08V (vs. RHE). The accelerated durability test (ADT) was conducted in the potential range from -0.08 to 0.02 V vs. RHE at a scan rate of 100  $\text{mV s}^{-1}$ . Long-term stability was assessed by chronopotentiometry at a current density of  $10 \text{ mA cm}^{-2}$  for 20 h. The Faradaic yield was calculated from the total charge  $Q$  (C) passed through the cell and the total amount of oxygen produced  $n$  (mol). Theoretically, the production of 0.38 ml of hydrogen at a current of 20 mA would take approximately 300 seconds (the molar volume of gas is  $24.5 \text{ L mol}^{-1}$  at  $25 \text{ }^\circ\text{C}$ ).

Hydrazine oxidation reactions (HzOR) and oxygen evolution reaction (OER) were performed in  $\text{N}_2$ -saturated  $0.5 \text{ M H}_2\text{SO}_4 + 0.05 \text{ M N}_2\text{H}_4$  solution and  $\text{O}_2$ -saturated  $0.5 \text{ M H}_2\text{SO}_4$  solution, respectively. The LSV curve sweeps were recorded at a scan rate of  $5 \text{ mV s}^{-1}$ , with the data corrected for  $iR$  losses. For HzOR, the chronoamperometric curves tracked the decay of current from  $10 \text{ mA cm}^{-2}$  over 20 h. The ADT was conducted in the potential range from 0.21 to 0.31 V vs. RHE at a scan rate of  $100 \text{ mV s}^{-1}$ .

Overall water splitting (OWS) and overall hydrazine splitting (OHZS) were conducted in a two-electrode configuration comprising a  $0.5 \text{ M H}_2\text{SO}_4$  solution and a  $0.5 \text{ M H}_2\text{SO}_4 + 0.05 \text{ M N}_2\text{H}_4$  solution as the electrolyte, respectively. Both cathode and anode comprised carbon cloth (active area of  $1 \times 1 \text{ cm}^2$ ) coated with 100  $\mu\text{L}$  of catalyst ink. LSV curves were performed at a rate of  $5 \text{ mV s}^{-1}$  and corrected for  $iR$  losses. Chronoamperometric curves also recorded the decay of current from  $10 \text{ mA cm}^{-2}$  over 20 h.

### ***In situ Raman measurements***

To monitor the electrochemical conversion of Rh- $\text{Co}_3\text{O}_4$  BNSs in real-time during the HzOR process, an inverse Raman spectroscopy setup, integrating a Labram HR800 and a 532 nm laser, was employed. In situ Electrochemical Surface-Enhanced Hyper-Raman Scattering (EC-SHINERS) was performed using this setup along with a CHI 760E electrochemical workstation. The Raman cell used in the experiment was obtained from Beijing Scistar Technology Co. Ltd. It was equipped with a  $(\text{Au}@\text{SiO}_2)@\text{VP}/\text{CNs}$ -modified GCE as the working electrode, a Pt wire as the counter electrode, and an Ag/AgCl (saturated KCl) electrode as the reference. The electrode potentials in in situ Raman tests

were converted to the reversible hydrogen electrode (RHE) scale using the equation:  $E_{(\text{RHE})} = E_{(\text{Ag}/\text{AgCl})} + 0.059 \text{ pH} + 0.197$ . Both Rh-Co<sub>3</sub>O<sub>4</sub>BNSs and Co<sub>3</sub>O<sub>4</sub> BNSs were tested at the potentials ranging from 0.05 to 0.25 V vs. RHE in a 0.05 M H<sub>2</sub>SO<sub>4</sub> + 0.05 M N<sub>2</sub>H<sub>4</sub> electrolyte solution.

### ***Theoretical Calculations***

All the spin-polarized density functional theory (DFT) calculations were performed *via* Vienna *ab initio* Simulation Package<sup>1-3</sup> (VASP) with the use of projector augmented-wave (PAW) method<sup>4,5</sup>. The exchange-correlation (XC) term in Kohn-Sham DFT equation was described by revised Perdew-Burke-Ernzerhof (RPBE) by Nørskov et al.<sup>6</sup> under the generalized gradient approximation (GGA) framework. The wavefunction in Kohn-Sham DFT equation was expanded using plane-wave basis sets with energy cutoff of 400 eV, which is accompanied by Gaussian smearing method with sigma value of 0.05 eV around the Fermi level. For pseudopotentials, the Rh 4d<sup>8</sup>5s<sup>1</sup>, Co 3d<sup>8</sup>4s<sup>1</sup>, and O 2s<sup>2</sup>2p<sup>4</sup> were treated as valence electrons. To describe the van der Waals correction, the D3 dispersion term proposed by Grimme et al.<sup>7</sup> with Becke-Johnson (BJ) damping was added upon RPBE as RPBE-D3(BJ). To deal with the strongly on-site coulombic interaction from localized 3d and 4d electrons, the Hubbard U correction by Dudarev et al.<sup>8</sup> was introduced by considering the effective U value ( $U_{\text{eff}}$ ), where 4.4, 6.7, and 2.0 eV were adopted for Co (T<sub>d</sub>)-3d, Co(O<sub>h</sub>)-3d, and Rh-4d electrons, respectively.<sup>9-11</sup> For geometric optimization, the force and energy convergence threshold were 0.02 eV/Å and 10<sup>-5</sup> eV, respectively. The first Brillouin-zone k-points sampling for bulk Co<sub>3</sub>O<sub>4</sub> structure was 4 × 4 × 4. According to previous work, the typical active surface of spinel oxide for OER was (001) surface, so in this model, we mainly concentrated on the (001) surface of Co<sub>3</sub>O<sub>4</sub>. For construction of slab model, the vacuum layer was set to 15 Å to avoid the periodic self-interaction along the z-direction.

To describe the HER process, H<sup>+</sup>/e<sup>-</sup> was treated by the computational hydrogen electrode (CHE) model proposed by Nørskov et al.<sup>12</sup> The free energy of H<sup>+</sup>/e<sup>-</sup> equals to 0.5 G(H<sub>2</sub>, g) at standard hydrogen electrode (SHE) condition ( $U_{\text{SHE}} = 0$ , pH = 0). At T = 298.15 K and p = 0.035 bar, the free energy of H<sub>2</sub>O(l) can be replaced by G(H<sub>2</sub>O, g). G(H<sub>2</sub>O, g) can be calculated by the H<sub>2</sub>O molecule in a periodic box. Free energy of O<sub>2</sub> can be indirectly calculated by referring to 2H<sub>2</sub>(g) + O<sub>2</sub>(g) → 2H<sub>2</sub>O(l) as  $G(\text{O}_2) = 2G(\text{H}_2\text{O}, \text{l}) - 2G(\text{H}_2) + 4.92 \text{ eV}$ . For each oxygen intermediate, the free energy can be calculated as  $G = E + \text{ZPE} - \text{TS}$ , where E stands for the total energy, ZPE is the zero-point energy, T

is the absolute temperature, and S represents the entropy. The bias potential acted on the free energy of  $e^-$  can be treated as  $\Delta G(U) = -eU_{\text{RHE}}$ , where  $U_{\text{RHE}}$  is the electrode potential versus reversible hydrogen electrode (RHE).

Surface Pourbaix diagrams<sup>13</sup> were investigated to unveil the realistic surface state by functioning electrode potential and pH effect. To be specific, various electrochemical intermediates were included:  $*\text{OH}$ ,  $*\text{O}$ , and  $*\text{H}$ . The different monolayer (ML) coverages of these intermediates were determined in equilibrium with  $\text{H}_2\text{O}$  and  $\text{H}^+/e^-$  via  $x\text{H}_2\text{O} + * \rightarrow *O_xH_y + (2x - y)(\text{H}^+ + e^-)$ :

$$\Delta G = G(*O_xH_y) + (2x - y) [0.5G(\text{H}_2) - eU_{\text{RHE}}] - xG(\text{H}_2\text{O}) - G(*)$$

## Figures and Tables

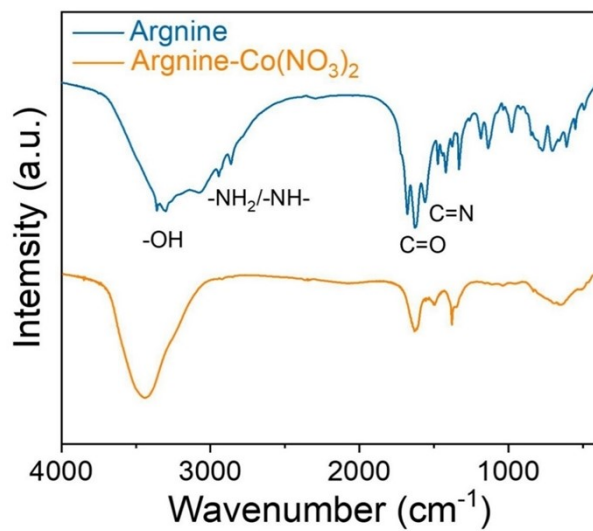

**Figure S1.** FTIR measurements of arginine-Co(NO<sub>3</sub>)<sub>2</sub> and arginine.

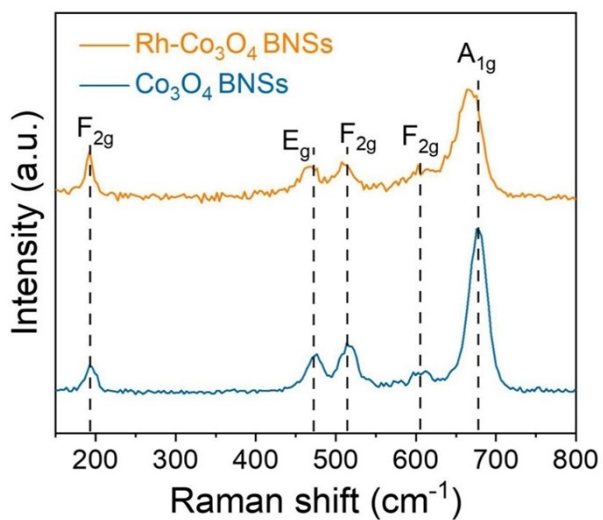

**Figure S2.** Raman spectra of Rh-Co<sub>3</sub>O<sub>4</sub> BNSs and Co<sub>3</sub>O<sub>4</sub> BNSs.

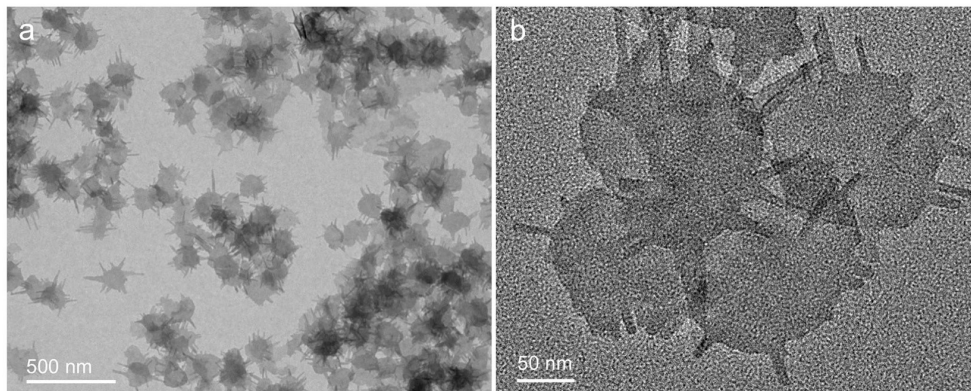

**Figure S3.** TEM images of Co<sub>3</sub>O<sub>4</sub> BNSs.

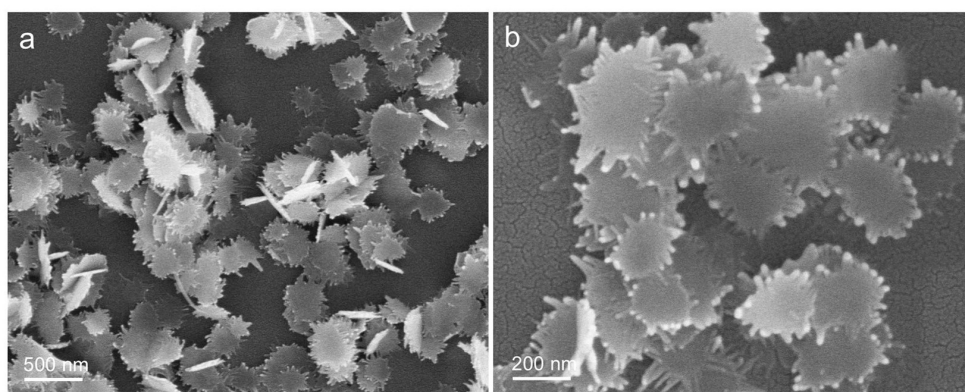

**Figure S4.** SEM images of Co<sub>3</sub>O<sub>4</sub> BNSs.



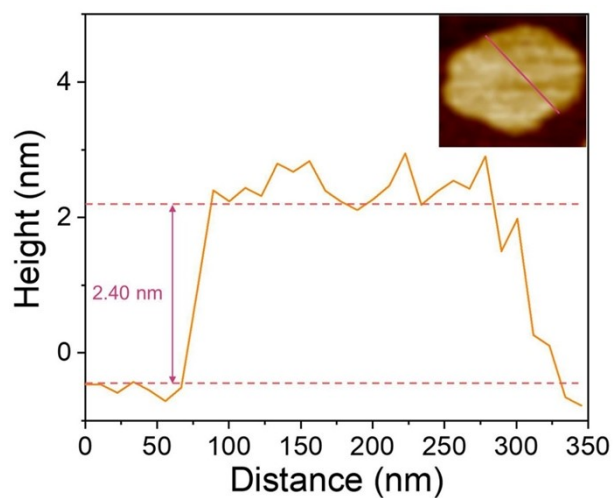

**Figure S5.** AFM image of  $\text{Co}_3\text{O}_4$  BNSs

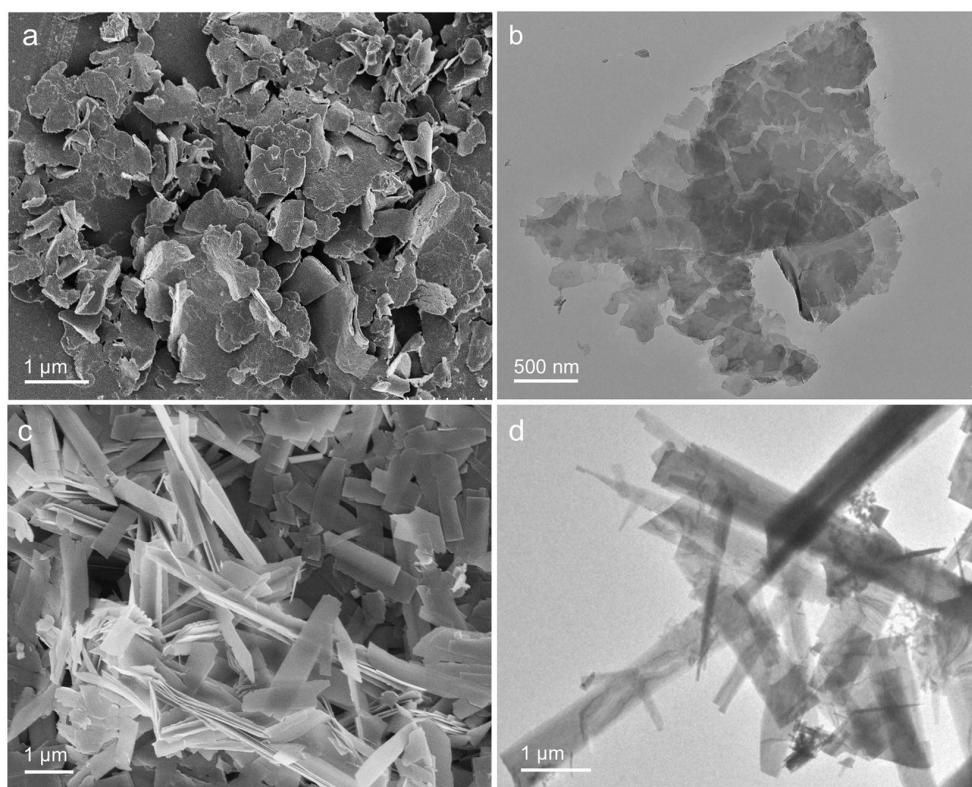

**Figure S6.** (a) SEM and (b) TEM images of  $\text{Co}_3\text{O}_4$  synthesized in the absence of arginine; (c) SEM and (d) TEM images of  $\text{Co}_3\text{O}_4$  synthesized at a high amount of arginine (600 mg).

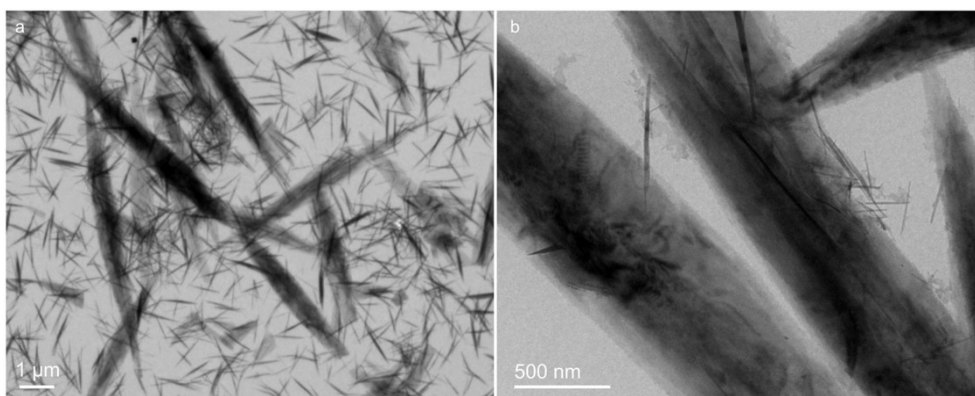

**Figure S7.** TEM images of the precursor prepared in pure water.

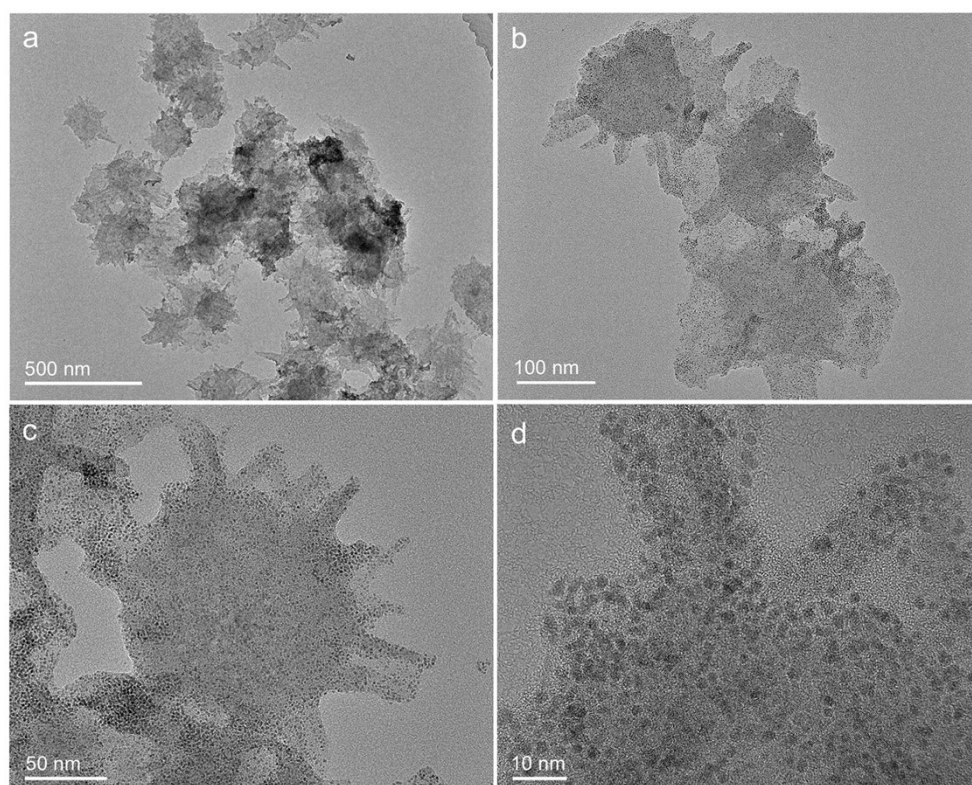

**Figure S8.** TEM images of Rh-Co<sub>3</sub>O<sub>4</sub> BNSs with different resolutions.

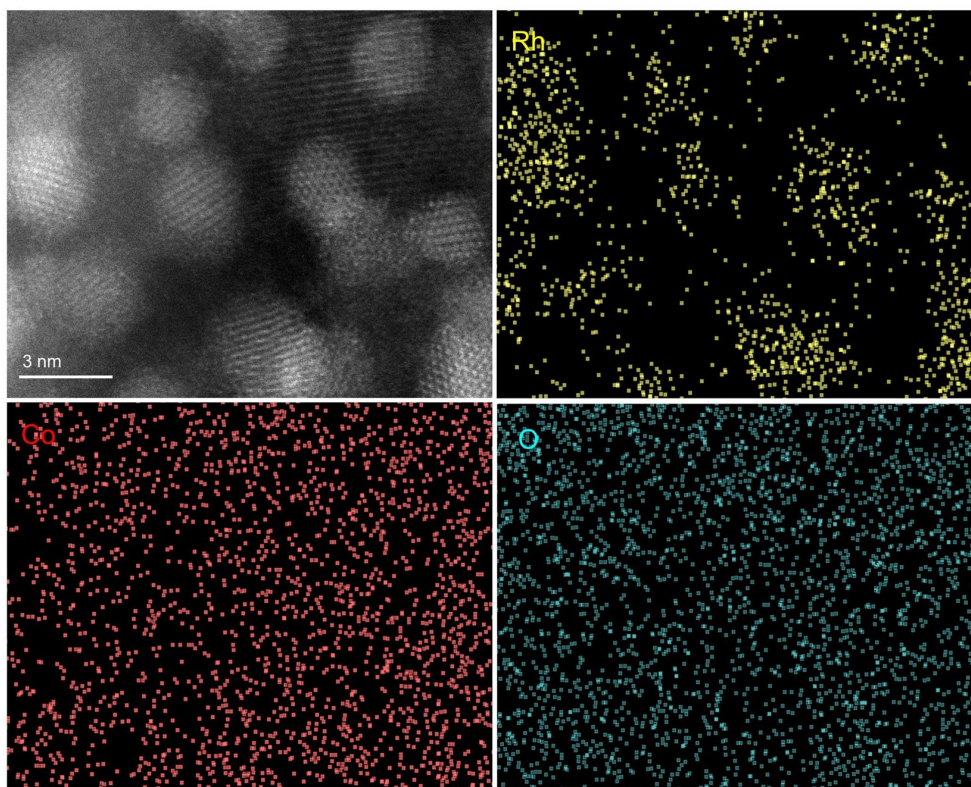

**Figure S9.** EDX element mapping images of Rh-Co<sub>3</sub>O<sub>4</sub> BNSs in the locally magnified region.

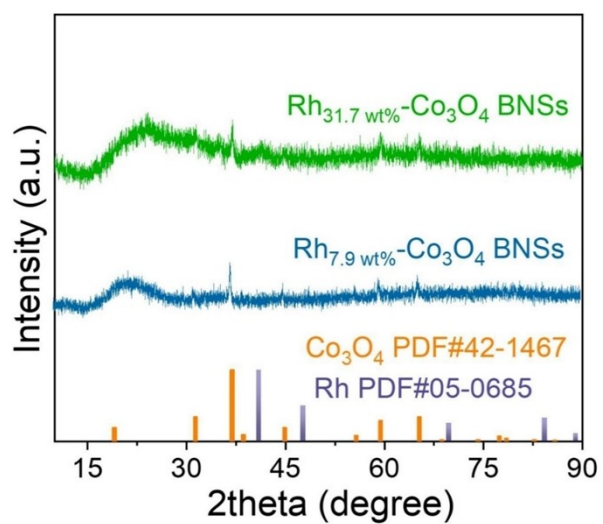

**Figure S10.** XRD patterns of Rh<sub>7.9 wt%</sub>-Co<sub>3</sub>O<sub>4</sub> BNSs and Rh<sub>31.7 wt%</sub>-Co<sub>3</sub>O<sub>4</sub> BNSs.

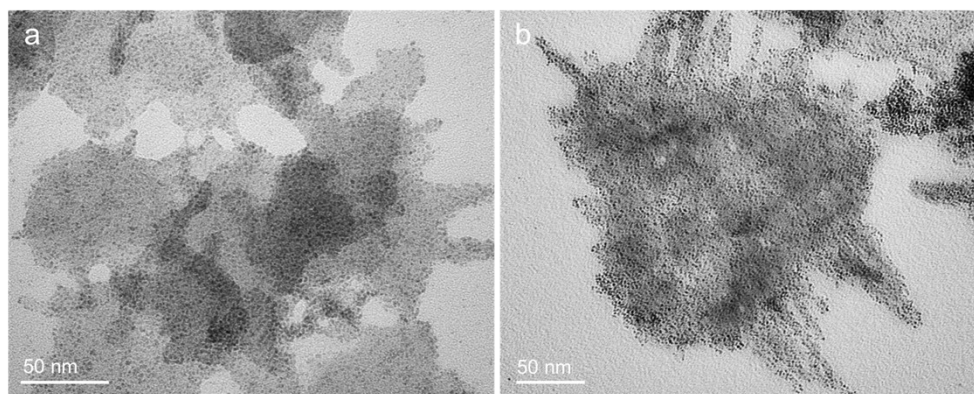

**Figure S11.** TEM images of (a) Rh<sub>7.9 wt%</sub>-Co<sub>3</sub>O<sub>4</sub> BNSs and (b) Rh<sub>31.7 wt%</sub>-Co<sub>3</sub>O<sub>4</sub> BNSs.

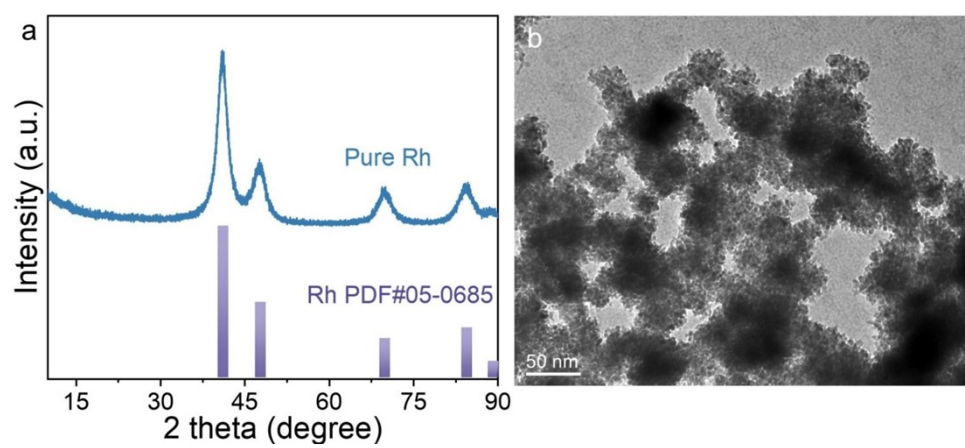

**Figure S12.** (a) XRD pattern and (b) TEM image of pure Rh.

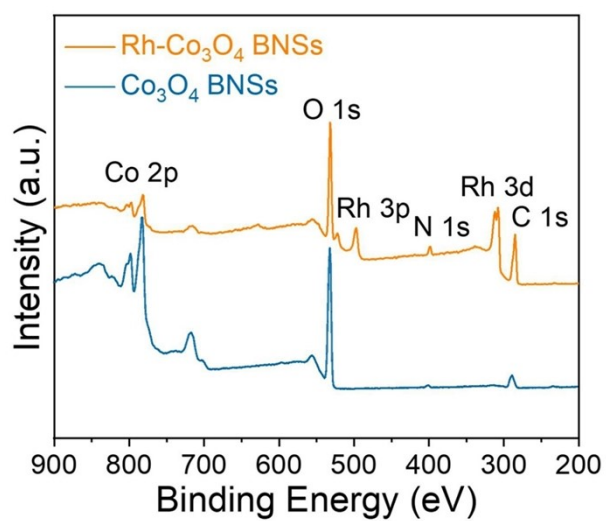

**Figure S13.** Full XPS spectra of Rh-Co<sub>3</sub>O<sub>4</sub> BNSs and Co<sub>3</sub>O<sub>4</sub> BNSs.

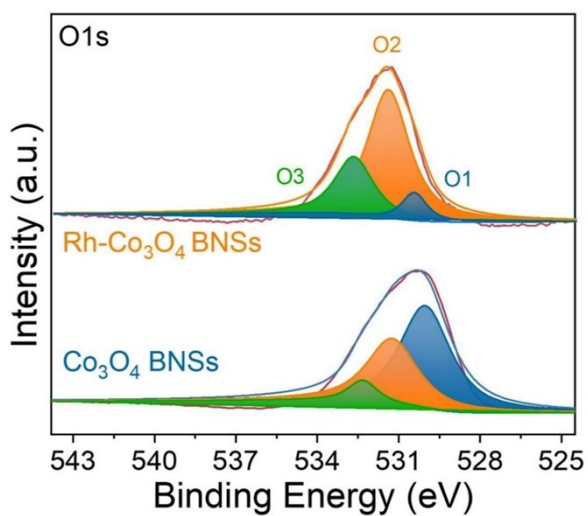

**Figure S14.** High-resolution O 1s XPS spectra of Rh-Co<sub>3</sub>O<sub>4</sub> BNSs and Co<sub>3</sub>O<sub>4</sub> BNSs.

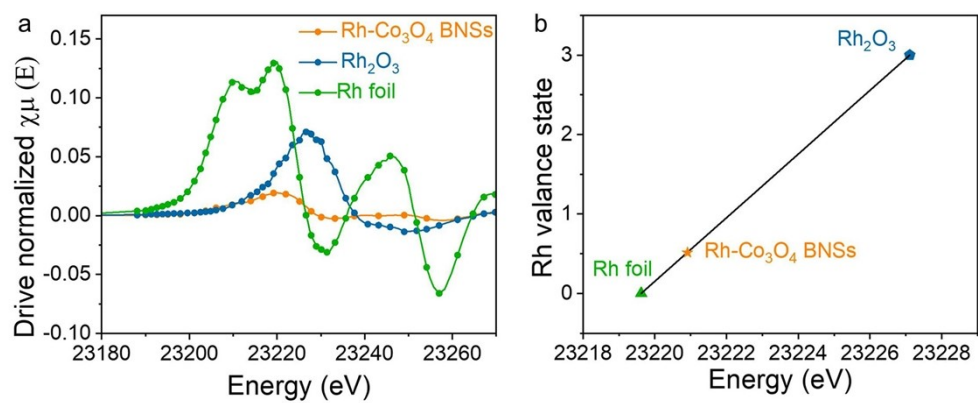

**Figure S15.** (a) Absorption threshold energy of Rh K-edge; (b) Calculated valence states of Rh electrocatalysts.

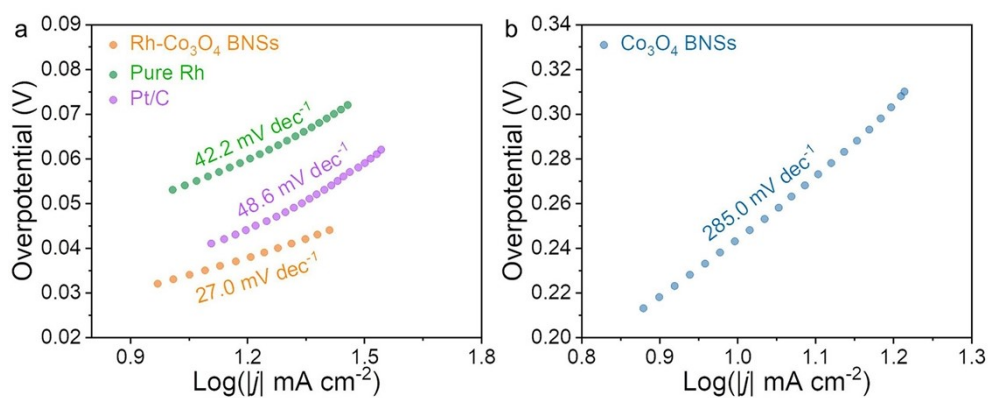

**Figure S16.** (a) Tafel slope of Rh-Co<sub>3</sub>O<sub>4</sub> BNSs, pure Rh, Pt/C and (b) Co<sub>3</sub>O<sub>4</sub> BNSs.

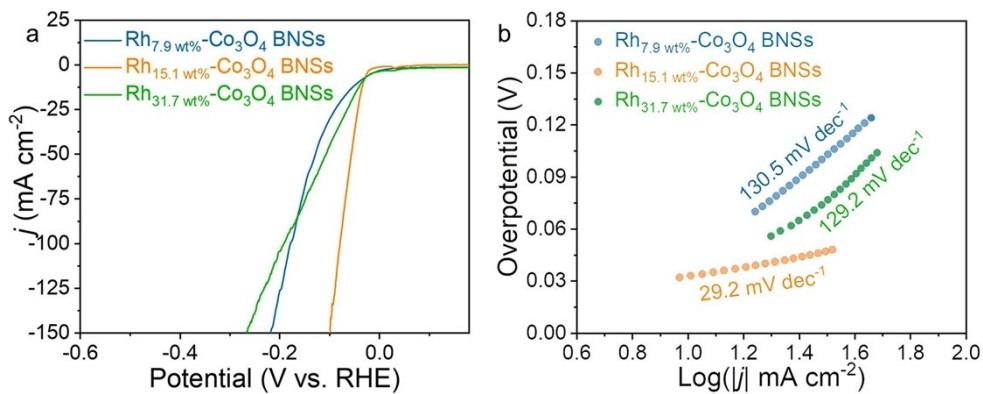

**Figure S17.** (a) HER polarization curves and (b) the corresponding Tafel slope of Rh<sub>7.9 wt%</sub>-Co<sub>3</sub>O<sub>4</sub> BNSs, Rh<sub>15.1 wt%</sub>-Co<sub>3</sub>O<sub>4</sub> BNSs and Rh<sub>31.7 wt%</sub>-Co<sub>3</sub>O<sub>4</sub> BNSs.

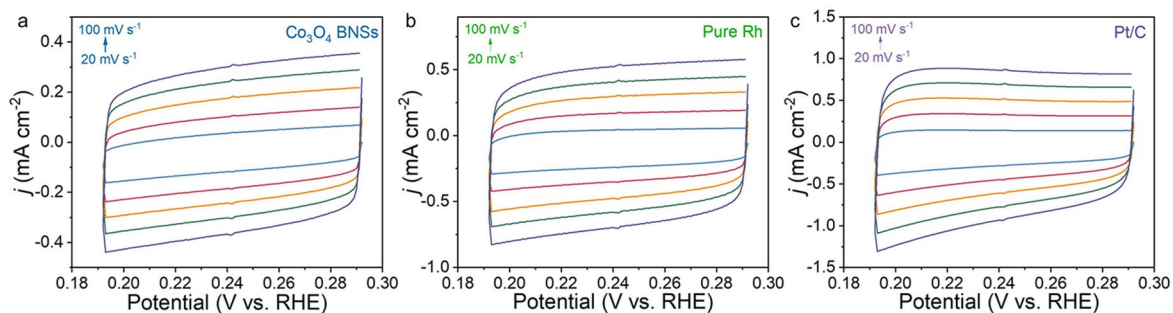

**Figure S18.** CV curves obtained for (a) Co<sub>3</sub>O<sub>4</sub> BNSs, (b) pure Rh and (c) Pt/C in 0.5 M H<sub>2</sub>SO<sub>4</sub> at different scanning rates from 20 to 100 mV s<sup>-1</sup>.

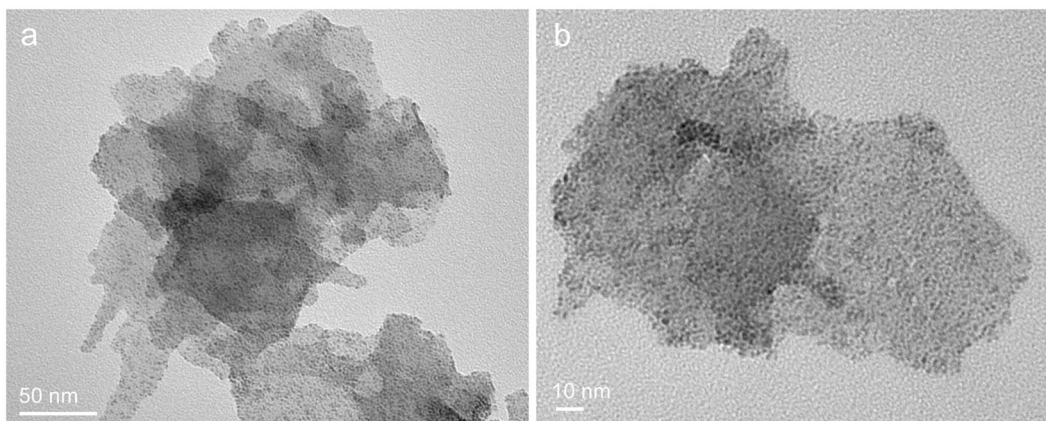

**Figure S19.** TEM images of of Rh-Co<sub>3</sub>O<sub>4</sub> BNSs after the HER stability test.

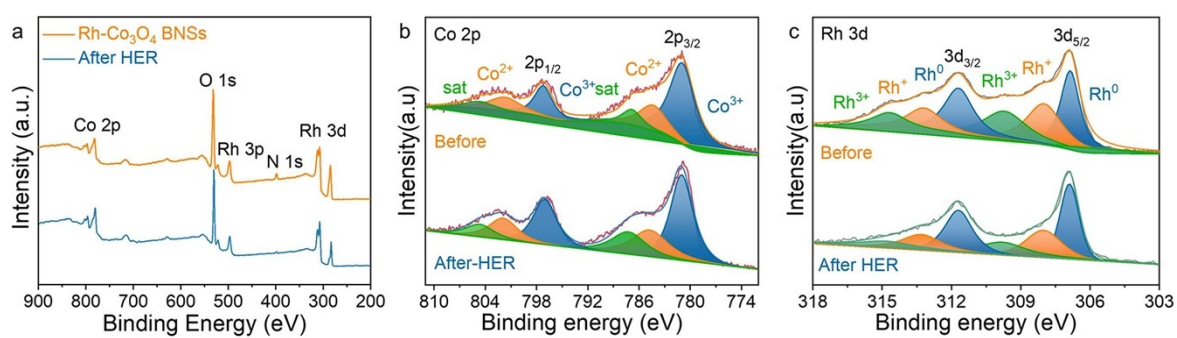

**Figure S20.** (a) Full XPS spectra, (b) Co 2p XPS spectra, and (c) Rh 3d XPS spectra after HER stability.



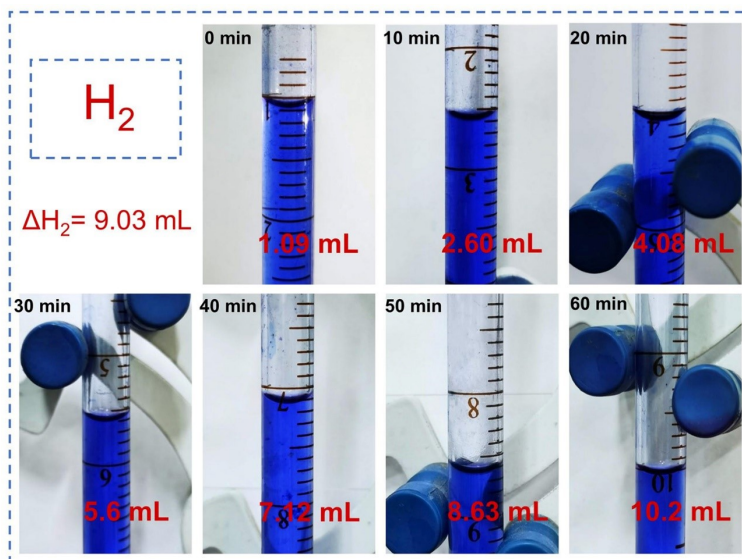

**Figure S21.** The volume change of produced  $H_2$  obtain from the drainage method.

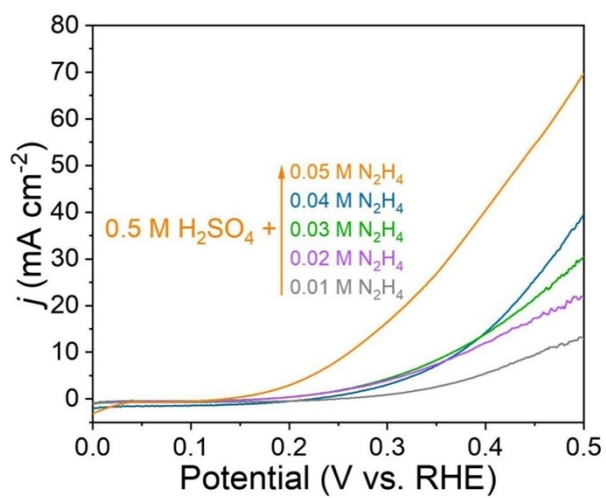

**Figure S22.** Polarization curves of  $Rh-Co_3O_4$  BNSs with different concentrations of hydrazine.

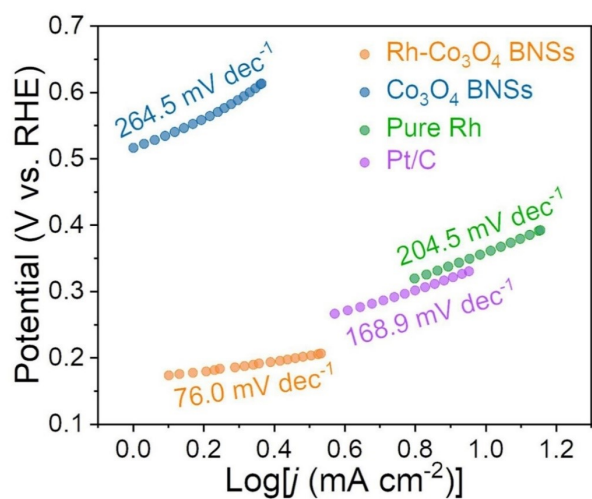

**Figure S23.** Tafel slope of Rh-Co<sub>3</sub>O<sub>4</sub> BNSs, Co<sub>3</sub>O<sub>4</sub> BNSs, pure Rh and Pt/C recorded from HzOR polarization curves.

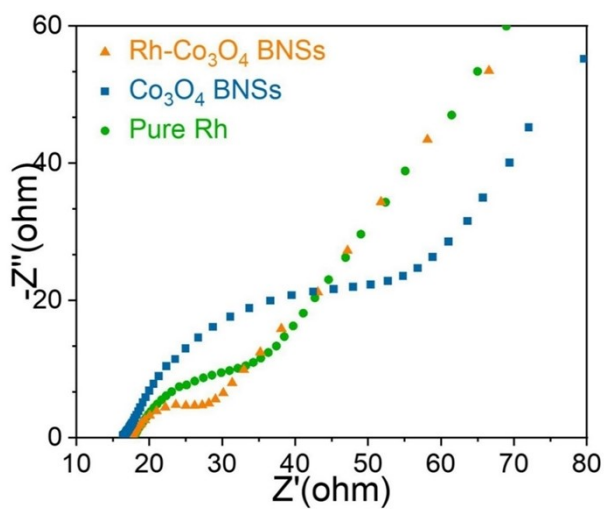

**Figure S24.** EIS Nyquist plots of HzOR.

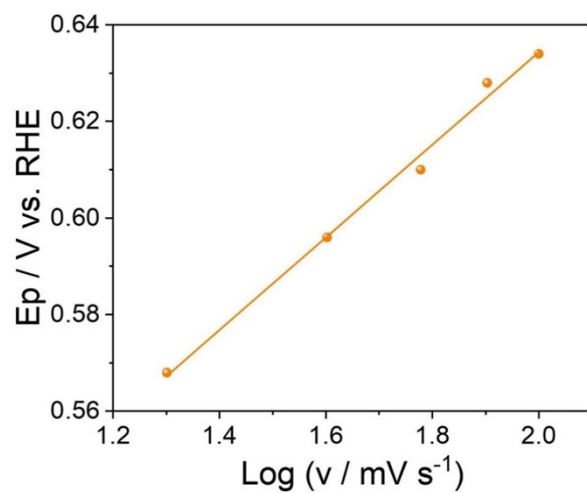

**Figure S25.**  $E_p$  vs.  $\log(v)$  plot from Figure 5d.

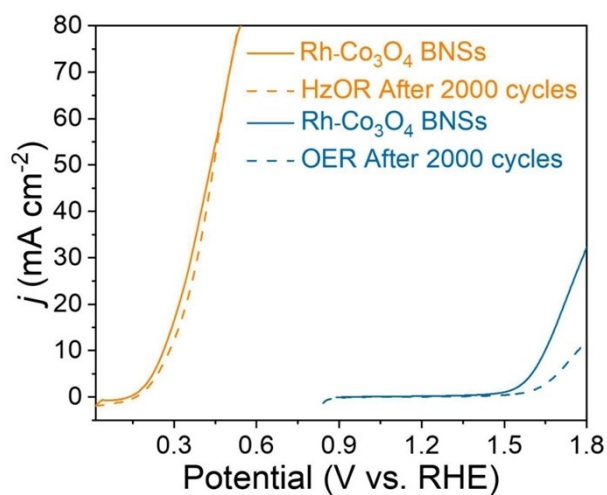

**Figure S26.** HER polarization curves of Rh-Co<sub>3</sub>O<sub>4</sub> BNSs in 0.5 M H<sub>2</sub>SO<sub>4</sub> with and without 0.05 M N<sub>2</sub>H<sub>4</sub>.

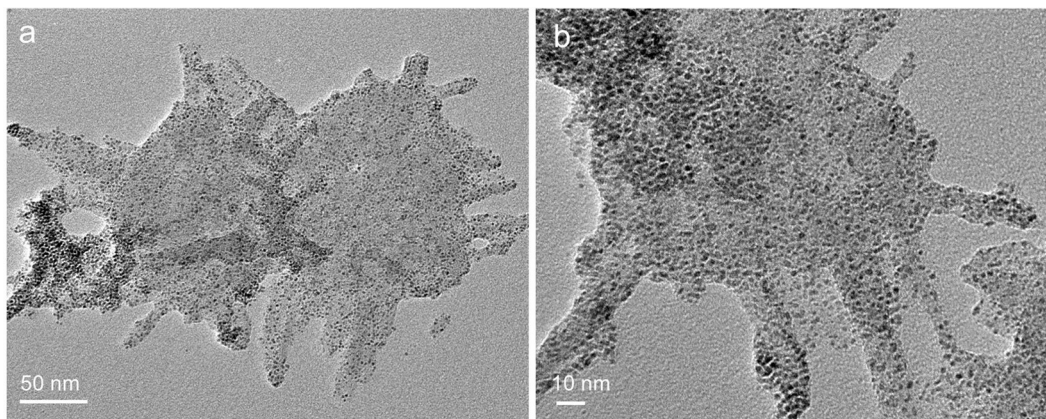

**Figure S27.** TEM images of Rh-Co<sub>3</sub>O<sub>4</sub> BNSs after the HzOR stability test.

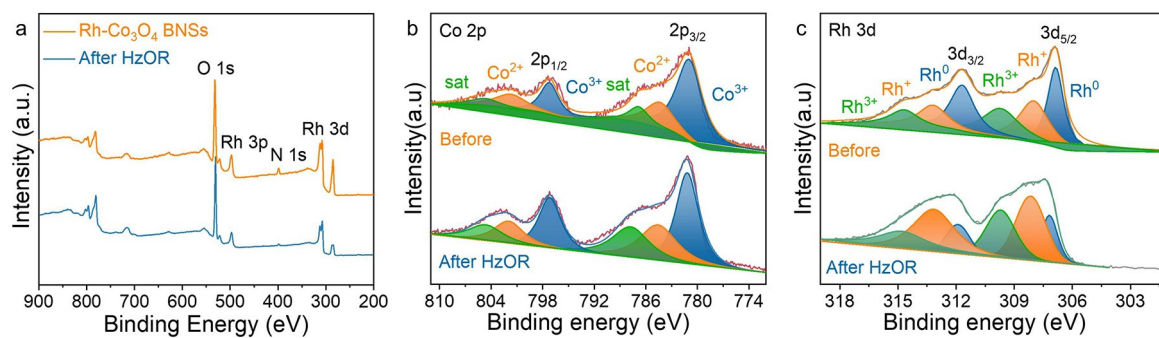

**Figure S28.** (a) Full XPS spectra, (b) Co 2p XPS spectra, and (c) Rh 3d XPS spectra after HzOR.

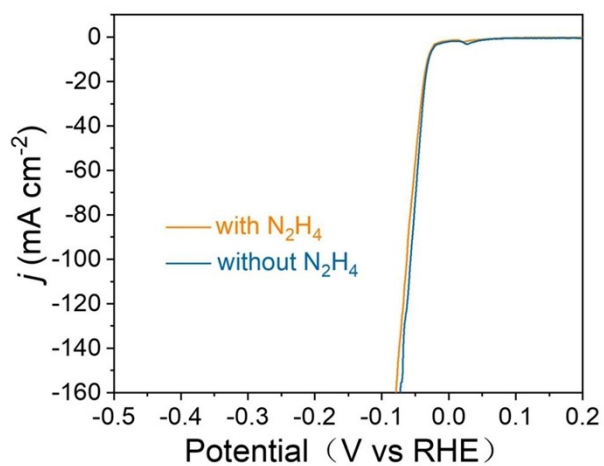

**Figure S29.** HER polarization curves of Rh-Co<sub>3</sub>O<sub>4</sub> BNSs in 0.5 M H<sub>2</sub>SO<sub>4</sub> with and without 0.05 M N<sub>2</sub>H<sub>4</sub>.

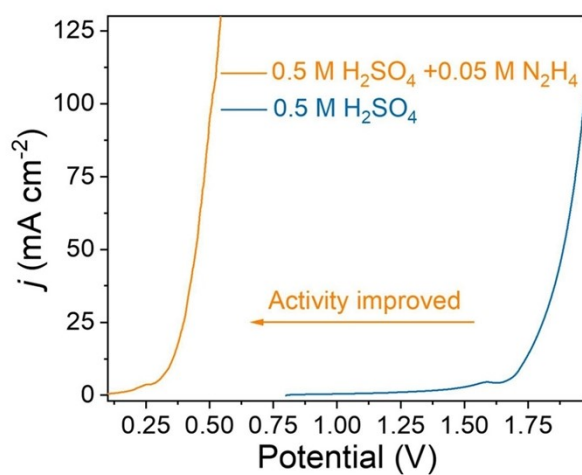

**Figure S30.** Polarization curves for OHzR in 0.5 M H<sub>2</sub>SO<sub>4</sub> + 0.05 M N<sub>2</sub>H<sub>4</sub> and OWS in 0.5 M H<sub>2</sub>SO<sub>4</sub>.

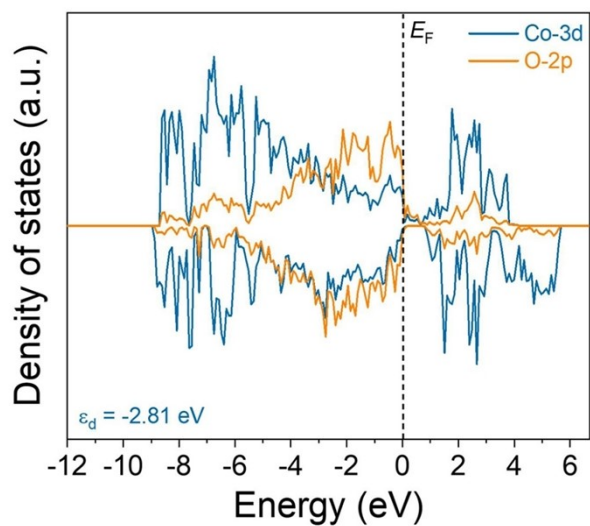

**Figure S31.** PDOS of  $\text{Co}_3\text{O}_4(100)$ .

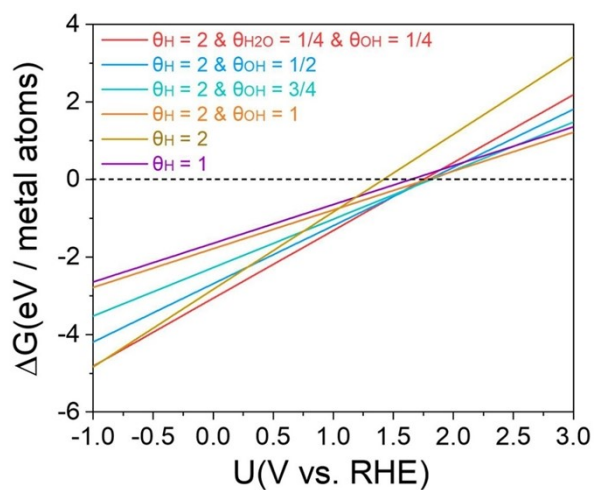

**Figure S32.** Calculated surface Pourbaix diagram at 25 °C and pH = 0.

**Table S1.** Comparison of HER activity of catalysts with reported catalysts.

| Catalyst                                  | Electrolyte                          | Overpotential<br>@10 mA cm <sup>-2</sup><br>(mV) | Tafel<br>(mV dec <sup>-1</sup> ) | Ref.      |
|-------------------------------------------|--------------------------------------|--------------------------------------------------|----------------------------------|-----------|
| Rh-Co <sub>3</sub> O <sub>4</sub> BNSs    | 0.5 M H <sub>2</sub> SO <sub>4</sub> | 32                                               | 27.0                             | This work |
| Pure Rh                                   | 0.5 M H <sub>2</sub> SO <sub>4</sub> | 53                                               | 42.2                             | This work |
| Co <sub>3</sub> O <sub>4</sub> BNSs       | 0.5 M H <sub>2</sub> SO <sub>4</sub> | 244                                              | 285                              | This work |
| RuO <sub>2</sub> -WC NPs                  | 0.5 M H <sub>2</sub> SO <sub>4</sub> | 58                                               | 66                               | 14        |
| RhSiW                                     | 0.5 M H <sub>2</sub> SO <sub>4</sub> | 46                                               | 49.9                             | 15        |
| Co-Pd-MoS <sub>2</sub>                    | 0.5 M H <sub>2</sub> SO <sub>4</sub> | 49.3                                             | 43.2                             | 16        |
| PdCu/C                                    | 0.5 M H <sub>2</sub> SO <sub>4</sub> | 40                                               | 48                               | 17        |
| N-CoP <sub>2</sub>                        | 0.5 M H <sub>2</sub> SO <sub>4</sub> | 38                                               | 46                               | 18        |
| RhSe <sub>2</sub>                         | 0.5 M H <sub>2</sub> SO <sub>4</sub> | 49.9                                             | 39                               | 19        |
| Ru-Te-C-2                                 | 0.5 M H <sub>2</sub> SO <sub>4</sub> | 39                                               | 32                               | 20        |
| Pt <sub>61</sub> La <sub>39</sub> @KB     | 0.5 M H <sub>2</sub> SO <sub>4</sub> | 38                                               | 29                               | 21        |
| CoP/Ni <sub>2</sub> P@Co(OH) <sub>2</sub> | 0.5 M H <sub>2</sub> SO <sub>4</sub> | 68                                               | 49                               | 22        |
| Ir-rEGO                                   | 0.5 M H <sub>2</sub> SO <sub>4</sub> | 42.3                                             | 25.7                             | 23        |
| Au-Pt-Ni                                  | 0.5 M H <sub>2</sub> SO <sub>4</sub> | 60                                               | 33                               | 24        |

**Table S2.** Comparison of small-molecule-oxidation activity of catalysts with reported catalysts.

| Catalyst                                           | Electrolyte                                                                 | Working potential<br>@10 mA cm <sup>-2</sup><br>(V vs. RHE) | Ref.      |
|----------------------------------------------------|-----------------------------------------------------------------------------|-------------------------------------------------------------|-----------|
| Rh-Co <sub>3</sub> O <sub>4</sub> BNSs             | 0.5 M H <sub>2</sub> SO <sub>4</sub> + 0.05 M N <sub>2</sub> H <sub>4</sub> | 0.26                                                        | This work |
| Pure Rh                                            | 0.5 M H <sub>2</sub> SO <sub>4</sub> + 0.05 M N <sub>2</sub> H <sub>4</sub> | 0.36                                                        | This work |
| Co <sub>3</sub> O <sub>4</sub> BNSs                | 0.5 M H <sub>2</sub> SO <sub>4</sub> + 0.05 M N <sub>2</sub> H <sub>4</sub> | >0.70                                                       | This work |
| Rh <sub>2</sub> P uNSs                             | 0.5 M H <sub>2</sub> SO <sub>4</sub> + 0.05 M N <sub>2</sub> H <sub>4</sub> | 0.30                                                        | 25        |
| Rh <sub>2</sub> S <sub>3</sub> /NC                 | 0.5 M H <sub>2</sub> SO <sub>4</sub> + 0.1 M N <sub>2</sub> H <sub>4</sub>  | 0.53                                                        | 26        |
| Ir-SA/NC                                           | 0.5 M H <sub>2</sub> SO <sub>4</sub> +0.33 M N <sub>2</sub> H <sub>4</sub>  | 0.39                                                        | 27        |
| CoNiP-NIE                                          | 1 M KOH + 10 mM HMF                                                         | 1.29                                                        | 28        |
| NiClO-D                                            | 1 M KOH + 0.33 M Urea                                                       | 1.34                                                        | 29        |
| NiMoP <sub>x</sub> @Ni <sub>5</sub> P <sub>4</sub> | 1 M KOH + 1 M CH <sub>3</sub> OH                                            | 1.36                                                        | 30        |
| Ru@MnO <sub>2-x</sub>                              | 1 M KOH + 0.5 M Glycerol                                                    | 1.13                                                        | 31        |

**Table S3.** Comparison of OHzS performance with OWS promoted by reported catalysts.

| Catalyst                                                                       | Electrolyte                                                                 | Cell voltage<br>@10 mA cm <sup>-2</sup><br>(V) | Ref.      |
|--------------------------------------------------------------------------------|-----------------------------------------------------------------------------|------------------------------------------------|-----------|
| Rh-Co <sub>3</sub> O <sub>4</sub> BNSs  Rh-Co <sub>3</sub> O <sub>4</sub> BNSs | 0.5 M H <sub>2</sub> SO <sub>4</sub> + 0.05 M N <sub>2</sub> H <sub>4</sub> | 0.34                                           | This work |
| Pt/C  Pt/C                                                                     | 0.5 M H <sub>2</sub> SO <sub>4</sub> + 0.05 M N <sub>2</sub> H <sub>4</sub> | 0.51                                           | This work |
| Rh-Co <sub>3</sub> O <sub>4</sub> BNSs  Rh-Co <sub>3</sub> O <sub>4</sub> BNSs | 0.5 M H <sub>2</sub> SO <sub>4</sub>                                        | 1.72                                           | This work |
| Ir@SrIrO <sub>3</sub> -175  Ir@SrIrO <sub>3</sub> -175                         | 0.5 M H <sub>2</sub> SO <sub>4</sub>                                        | 1.49                                           | 32        |
| Co-RuIr  Co-RuIr                                                               | 0.1 M HClO <sub>4</sub>                                                     | 1.52                                           | 33        |
| Rh <sub>2</sub> P uNSs   Rh <sub>2</sub> P uNSs                                | 0.5 M H <sub>2</sub> SO <sub>4</sub> + 0.05 M N <sub>2</sub> H <sub>4</sub> | 0.38                                           | 25        |
| Rh <sub>2</sub> S <sub>3</sub> /NC   Rh <sub>2</sub> S <sub>3</sub> /NC        | 0.5 M H <sub>2</sub> SO <sub>4</sub> + 0.1 M N <sub>2</sub> H <sub>4</sub>  | 0.38                                           | 26        |
| Ir-SA/NC   Ir-SA/NC                                                            | 0.5 M H <sub>2</sub> SO <sub>4</sub> +0.33 M N <sub>2</sub> H <sub>4</sub>  | 0.39                                           | 27        |
| Rh/RhOx-500   Rh/RhOx-500                                                      | 0.5 M H <sub>2</sub> SO <sub>4</sub> + 0.5 M N <sub>2</sub> H <sub>4</sub>  | 0.35                                           | 34        |
| MnO <sub>2</sub> /CP   MnO <sub>2</sub> /CP                                    | 0.005 M H <sub>2</sub> SO <sub>4</sub> +0.2 M Glycerol                      | 1.38                                           | 35        |
| Pd/NiCo <sub>2</sub> O <sub>4</sub> -2  Pd/NiCo <sub>2</sub> O <sub>4</sub> -2 | 1 M KOH + 0.5 M N <sub>2</sub> H <sub>4</sub>                               | 0.35                                           | 36        |
| Ni—MoN/NF-6  Ni—MoN/NF-6                                                       | 1 M KOH + 0.5 M Methanol & 0.5<br>M H <sub>2</sub> SO <sub>4</sub>          | 0.56                                           | 37        |
| O-NiMoP/NF   O-NiMoP/NF                                                        | 1 M KOH + 0.5 M Urea                                                        | 1.36                                           | 38        |
| Co-Rh <sub>2</sub>   Co-Rh <sub>2</sub>                                        | 1 M KOH + 1.0 M CH <sub>3</sub> OH                                          | 1.55                                           | 39        |
| PtCu NF/C   PtCu NF/C                                                          | 1 M KOH +0.5 M Ethanol                                                      | 0.58                                           | 40        |



## References

1. J. Hafner, Ab-initio simulations of materials using VASP: Density-functional theory and beyond, *J. Comput. Chem.*, 2008, **29**, 2044-2078.
2. G. Kresse and J. Furthmüller, Efficient iterative schemes for ab initio total-energy calculations using a plane-wave basis set, *Phys. Rev. B*, 1996, **54**, 11169-11186.
3. G. Kresse and J. Furthmüller, Efficiency of ab-initio total energy calculations for metals and semiconductors using a plane-wave basis set, *Comput. Mater. Sci.*, 1996, **6**, 15-50.
4. P. E. Blöchl, Projector augmented-wave method, *Phys. Rev. B*, 1994, **50**, 17953-17979.
5. G. Kresse and D. Joubert, From ultrasoft pseudopotentials to the projector augmented-wave method, *Phys. Rev. B*, 1999, **59**, 1758-1775.
6. B. Hammer, L. B. Hansen and J. K. Nørskov, Improved adsorption energetics within density-functional theory using revised Perdew-Burke-Ernzerhof functionals, *Phys. Rev. B*, 1999, **59**, 7413-7421.
7. S. Grimme, S. Ehrlich and L. Goerigk, Effect of the damping function in dispersion corrected density functional theory, *J. Comput. Chem.*, 2011, **32**, 1456-1465.
8. S. L. Dudarev, G. A. Botton, S. Y. Savrasov, C. J. Humphreys and A. P. Sutton, Electron-energy-loss spectra and the structural stability of nickel oxide: An LSDA+U study, *Phys. Rev. B*, 1998, **57**, 1505-1509.
9. X. Shi, S. L. Bernasek and A. Selloni, Formation, Electronic Structure, and Defects of Ni Substituted Spinel Cobalt Oxide: a DFT+U Study, *J. Phys. Chem. C*, 2016, **120**, 14892-14898.
10. Y. G. Zhang, G. B. Zhang and Y. Xu Wang, First-principles study of the electronic structure and optical properties of Ce-doped ZnO, *J. Appl. Phys.*, 2011, **109**, 063510.
11. N. Stojić, N. Binggeli and M. Altarelli, Surface magnetism of Rh(001) from LDA+U calculations, *Phys. Rev. B*, 2006, **73**, 100405.
12. J. K. Nørskov, J. Rossmeisl, A. Logadottir, L. Lindqvist, J. R. Kitchin, T. Bligaard and H. Jónsson, Origin of the Overpotential for Oxygen Reduction at a Fuel-Cell Cathode, *J. Phys. Chem. B*, 2004, **108**, 17886-17892.
13. H. A. Hansen, J. Rossmeisl and J. K. Nørskov, Surface Pourbaix diagrams and oxygen reduction activity of Pt, Ag and Ni(111) surfaces studied by DFT, *Phys. Chem. Chem. Phys.*, 2008, **10**, 3722-3730.

14. S. C. Sun, H. Jiang, Z. Y. Chen, Q. Chen, M. Y. Ma, L. Zhen, B. Song and C. Y. Xu, Bifunctional WC-Supported RuO<sub>2</sub> Nanoparticles for Robust Water Splitting in Acidic Media, *Angew. Chem. Int. Ed.*, 2022, **61**, e202202519.
15. D. Jeon, D. Y. Kim, H. Kim, N. Kim, C. Lee, D. H. Seo and J. Ryu, Electrochemical Evolution of Ru-Based Polyoxometalates into Si,W-Codoped RuO<sub>x</sub> for Acidic Overall Water Splitting, *Adv. Mater.*, 2024, **36**, e2304468.
16. W. Yang, S. Zhang, Q. Chen, C. Zhang, Y. Wei, H. Jiang, Y. Lin, M. Zhao, Q. He, X. Wang, Y. Du, L. Song, S. Yang, A. Nie, X. Zou and Y. Gong, Conversion of Intercalated MoO<sub>3</sub> to Multi-Heteroatoms-Doped MoS<sub>2</sub> with High Hydrogen Evolution Activity, *Adv. Mater.*, 2020, **32**, e2001167.
17. A. Mahmood, D. He, C. Liu, S. H. Talib, B. Zhao, T. Liu, Y. He, L. Chen, D. Han and L. Niu, Unveiling the Growth Mechanism of Ordered-Phase within Multimetallic Nanoplates, *Adv. Sci.*, 2024, **11**, 2309163.
18. J. Cai, Y. Song, Y. Zang, S. Niu, Y. Wu, Y. Xie, X. Zheng, Y. Liu, Y. Lin, X. Liu, G. Wang and Y. Qian, N-induced lattice contraction generally boosts the hydrogen evolution catalysis of P-rich metal phosphides, *Sci. Adv.*, **6**, eaaw8113.
19. W. Zhong, B. Xiao, Z. Lin, Z. Wang, L. Huang, S. Shen, Q. Zhang and L. Gu, RhSe<sub>2</sub>: A Superior 3D Electrocatalyst with Multiple Active Facets for Hydrogen Evolution Reaction in Both Acid and Alkaline Solutions, *Adv. Mater.*, 2021, **33**, e2007894.
20. F. Yang, Q. Wang, J. Li and L. Feng, Structural evolution of Ru/Te interaction for hydrogen generation engineered by proof of concept via carbon doping, *Mater. Today Phys.*, 2023, **38**, 101262.
21. N. Nie, D. Zhang, Z. Wang, Y. Qin, X. Zhai, B. Yang, J. Lai and L. Wang, Superfast Synthesis of Densely Packed and Ultrafine Pt-Lanthanide@KB via Solvent-Free Microwave as Efficient Hydrogen Evolution Electrocatalysts, *Small*, 2021, **17**, e2102879.
22. M. Xing, H. Liu, X. Dong, Z. Liang, S. Huang, X. Ding, L. Yang, Z. Liu, S. Wang and D. Cao, Co(OH)<sub>2</sub> promoting the catalytic activity of CoP/Ni<sub>2</sub>P heterojunction for hydrogen evolution in both alkaline and acid media, *Mater. Today Energy*, 2022, **30**, 101142.
23. X. Li, J. Cao, J. Chen, Y. Zhu, H. Xia, Z. Xu, C. Gu, J. Xie, M. Jones, C. Lyu, J. Corbin, X. Li and W. Hu, UV-Induced Synthesis of Graphene Supported Iridium Catalyst with Multiple Active Sites for Overall Water Splitting, *Adv. Funct. Mater.*, 2024, **34**, 2313530.
24. S. Khamgaonkar, Q. Chen, K. Musselman and V. Maheshwari, Stable perovskite photocathodes

for efficient hydrogen evolution in acidic and basic conditions, *J. Mater. Chem. A*, 2023, **11**, 20079-20088.

25. Y. Zhao, N. Jia, X.-R. Wu, F.-M. Li, P. Chen, P.-J. Jin, S. Yin and Y. Chen, Rhodium phosphide ultrathin nanosheets for hydrazine oxidation boosted electrochemical water splitting, *Appl. Catal. B: Environ.*, 2020, **270**, 118880.

26. C. Zhang, H. Liu, Y. Liu, X. Liu, Y. Mi, R. Guo, J. Sun, H. Bao, J. He, Y. Qiu, J. Ren, X. Yang, J. Luo and G. Hu, Rh<sub>2</sub>S<sub>3</sub>/N-Doped Carbon Hybrids as pH-Universal Bifunctional Electrocatalysts for Energy-Saving Hydrogen Evolution, *Small Methods*, 2020, **4**, 2000208.

27. F. Luo, S. Pan, Y. Xie, C. Li, Y. Yu, H. Bao and Z. Yang, Hydrazine-Assisted Acidic Water Splitting Driven by Iridium Single Atoms, *Adv. Sci.*, 2023, **10**, 2305058.

28. Y. Song, W. Xie, Y. Song, H. Li, S. Li, S. Jiang, J. Y. Lee and M. Shao, Bifunctional integrated electrode for high-efficient hydrogen production coupled with 5-hydroxymethylfurfural oxidation, *Appl. Catal. B: Environ.*, 2022, **312**, 121400.

29. L. Zhang, L. Wang, H. Lin, Y. Liu, J. Ye, Y. Wen, A. Chen, L. Wang, F. Ni, Z. Zhou, S. Sun, Y. Li, B. Zhang and H. Peng, A Lattice-Oxygen-Involved Reaction Pathway to Boost Urea Oxidation, *Angew. Chem. Int. Ed.*, 2019, **58**, 16820-16825.

30. B. Zhu, J. Xiong, S. Wu, K. You, B. Sun, Y. Liu, M. Chen, P. Jin and L. Feng, Core@Shell Heterostructured NiMoP<sub>x</sub>@Ni<sub>5</sub>P<sub>4</sub> Nanorod Arrays Promoting Direct Electro-Oxidation of Methanol and Hydrogen Evolution under Industry Conditions, *Adv. Funct. Mater.*, 2024, 2407236.

31. H. Yu, M. Hu, C. Chen, C. Hu, Q. Li, F. Hu, S. Peng and J. Ma, Ambient gamma-Rays-Mediated Noble-Metal Deposition on Defect-Rich Manganese Oxide for Glycerol-Assisted H<sub>2</sub> Evolution at Industrial-Level Current Density, *Angew. Chem. Int. Ed.*, 2023, **62**, e202314569.

32. L. Zhao, Z. Tao, M. You, H. Xiao, S. Wang, W. Ma, Y. Huang, B. He and Q. Chen, Partial Exsolution Enables Superior Bifunctionality of Ir@SrIrO<sub>3</sub> for Acidic Overall Water Splitting, *Adv. Sci.*, 2024, **11**, e2309750.

33. J. Shan, T. Ling, K. Davey, Y. Zheng and S. Z. Qiao, Transition-Metal-Doped RuIr Bifunctional Nanocrystals for Overall Water Splitting in Acidic Environments, *Adv. Mater.*, 2019, **31**, e1900510.

34. J. Yang, L. Xu, W. Zhu, M. Xie, F. Liao, T. Cheng, Z. Kang and M. Shao, Rh/RhO<sub>x</sub> nanosheets as pH-universal bifunctional catalysts for hydrazine oxidation and hydrogen evolution reactions, *J. Mater. Chem. A*, 2022, **10**, 1891-1898.

35. Y. Li, X. Wei, S. Han, L. Chen and J. Shi, MnO<sub>2</sub> Electrocatalysts Coordinating Alcohol Oxidation for Ultra-Durable Hydrogen and Chemical Productions in Acidic Solutions, *Angew. Chem. Int. Ed.*, 2021, **60**, 21464-21472.
36. R. A. Senthil, S. Jung, A. Min, A. Kumar, C. J. Moon, M. Singh and M. Y. Choi, Revealing the Impact of Pulsed Laser-Produced Single-Pd Nanoparticles on a Bimetallic NiCo<sub>2</sub>O<sub>4</sub> Electrocatalyst for Energy-Saving Hydrogen Production via Hybrid Water Electrolysis, *ACS Catal.*, 2024, **14**, 3320-3335.
37. C. Rao, H. Wang, K. Chen, H. Chen, S. Ci, Q. Xu and Z. Wen, Hybrid Acid/Base Electrolytic Cell for Hydrogen Generation and Methanol Conversion Implemented by Bifunctional Ni/MoN Nanorod Electrocatalyst, *Small*, 2024, **20**, e2303300.
38. H. Jiang, M. Sun, S. Wu, B. Huang, C. S. Lee and W. Zhang, Oxygen-Incorporated NiMoP Nanotube Arrays as Efficient Bifunctional Electrocatalysts For Urea-Assisted Energy-Saving Hydrogen Production in Alkaline Electrolyte, *Adv. Funct. Mater.*, 2021, **31**, 2104951.
39. Y. Guo, X. Yang, X. Liu, X. Tong and N. Yang, Coupling Methanol Oxidation with Hydrogen Evolution on Bifunctional Co-Doped Rh Electrocatalyst for Efficient Hydrogen Generation, *Adv. Funct. Mater.*, 2022, **33**, 2209134.
40. H. Fu, N. Zhang, F. Lai, L. Zhang, S. Chen, H. Li, K. Jiang, T. Zhu, F. Xu and T. Liu, Surface-Regulated Platinum–Copper Nanoframes in Electrochemical Reforming of Ethanol for Efficient Hydrogen Production, *ACS Catal.*, 2022, **12**, 11402-11411.
